## 1 **Abstract**

2           Physical practice (PP) and motor imagery practice (MP) lead to the execution of fast  
3 and accurate arm movements. However, there is currently no information about the influence  
4 of MP on movement smoothness, nor about which performance parameters best discriminate  
5 these practices. In the current study, we assessed motor performances with an arm pointing task  
6 with constrained precision before and after PP (n= 15), MP (n= 15), or no practice (n= 15). We  
7 analyzed gains between Pre- and Post-Test for five performance parameters: movement  
8 duration, mean and maximal velocities, total displacements, and the number of velocity peaks  
9 characterizing movement smoothness. The results showed an improvement of performance  
10 after PP and MP for all parameters, except for total displacements. The gains for movement  
11 duration, and mean and maximal velocities were statistically higher after PP and MP than after  
12 no practice, and comparable between practices. However, motor gains for the number of  
13 velocity peaks were higher after PP than MP, suggesting that movements were smoother after  
14 PP than after MP. A discriminant analysis also identified the number of velocity peaks as the  
15 most relevant parameter that differentiated PP from MP. The current results provide evidence  
16 that PP and MP specifically modulate movement smoothness during arm reaching tasks. This  
17 difference may rely on online corrections through sensory feedback integration, available  
18 during PP but not during MP.

19

20

21 **Keywords:** motor imagery, movement smoothness, feedbacks, internal models, motor learning.

22

## 1 **Introduction**

2           Motor skill learning is a central process in everyday life, sustaining adaptation and  
3 efficiency of motor behaviors in constantly changing environments. Through physical practice  
4 (PP), movements are performed faster, more accurately, and require less energy consumption  
5 (Willingham, 1998). Even if continuous and extended practice is known to greatly and durably  
6 improve motor performance (Robertson et al., 2004; Kitago and Krakauer, 2013), positive  
7 effects of practice can also be observed within a single training session. A growing number of  
8 studies indeed observed that a few minutes of practice is sufficient to induce gains in motor  
9 performance (e.g., speed and accuracy) on a wide variety of motor tasks, such as sequential  
10 finger-tapping or arm-reaching tasks (Karni et al., 1998; Walker et al., 2003; Gentili et al., 2006,  
11 2010; Spampinato and Celnik, 2017; Ruffino et al., 2021). This fast learning process, known as  
12 motor acquisition, is considered as the first step towards the formation of new and robust motor  
13 memories.

14           Although skill learning usually requires PP, alternative forms of practice also exist.  
15 Among these, motor imagery, that is the mental simulation of an action without associated  
16 motor output, has been largely documented. In fact, mental practice (MP) improves several  
17 aspects of motor performance, such as movement accuracy, speed, and force (Yue and Cole,  
18 1992; Yáguiez et al., 1998; Ranganathan et al., 2004; Gentili et al., 2006, 2010; Allami et al.,  
19 2008; Lebon et al., 2010; Grosprêtre et al., 2018; Ruffino et al., 2021). Performance increases  
20 following MP is associated with specific neural mechanisms at both cortical and spinal levels  
21 (Avanzino et al., 2015; Grosprêtre et al., 2019; Ruffino et al., 2019). Specifically, an acute  
22 session of MP induces use-dependent plasticity into the primary motor cortex (Ruffino et al.  
23 2019) and spinal circuitry (Grosprêtre et al. 2019). At the functional level, it is proposed that  
24 motor performance improvement following MP may reflect an update of internal forward  
25 models (Kilteni et al., 2018; Dahm and Rieger, 2019; Ruffino et al., 2021). Basically, internal

1 forward models are neural network that predict the future sensorimotor state (e.g., velocity,  
2 movement duration, position) given the current state, the efferent copy of the motor command,  
3 and the goal of the movement (Kawato et al., 2003; Wolpert & Flanagan, 2001). Kilteni et al.  
4 (2018) strongly supported this assumption by showing that the sensory consequences of  
5 imagined movements are predicted during motor imagery.

6         Although PP and MP share common mechanisms, a number of dissimilarities also exist.  
7 Perhaps the main difference, at least the most visible, is that during MP there is no sensory  
8 feedback about movement (position velocity and acceleration), since the imagined segment in  
9 inert. In error-based motor learning process, external sensory feedback is necessary to update  
10 the prediction of the internal forward model, via the discrepancy between the predicted state  
11 and the actual state (Kawato et al., 2003; Shadmehr et al., 2010; Shadmehr & Krakauer, 2008;  
12 Wolpert et al., 2011). Better state prediction will, in turn, improves the controller and thus the  
13 motor output. In the case of a model-free motor learning process, external feedback directly  
14 improves the controller through reward predictions error (Criscimagna-Hemminger et al., 2010;  
15 Izawa and Shadmehr, 2011). The absence of external feedback during MP could explain why  
16 after PP the performance improvement is better than after MP (Ingram et al., 2019), but does  
17 not explain the underline mechanism. Theoretically, it is proposed that the difference between  
18 the prediction and the desired outcome based on stored movement representations would be  
19 returned as an input to improve the subsequent motor command via a “self-supervised process”,  
20 explaining motor performance improvement despite the external feedback during MP (Gentili  
21 et al., 2010, Ruffino et al. 2021).

22         Up to now, performance improvement after MP has been measured, and compared to  
23 PP, mainly on three parameters: force, accuracy, and speed. Nonetheless, other parameters are  
24 of importance for motor performance, such as movement smoothness that is enhanced after PP  
25 (Balasubramanian et al., 2015). Smoothness is related to the form of the velocity profile, which

1 is singled-peaked with one acceleration and one deceleration phase. When the motor command  
2 is inaccurate a number of sub-movements are necessary to correct it, creating thus a non-optimal  
3 and clumsy movement (Kelso et al., 1979; Ketcham et al., 2002; Ketcham & Stelmach, 2004).  
4 Intriguingly, the effects of MP on this parameter are yet unknown.

5 In the current study, we sought to compare PP and MP, considering spatial, temporal,  
6 and smoothness parameters. We recorded movement-related trajectories on a graphic tablet  
7 from two training groups (PP and MP) and one control group (Ctrl, absence of practice). In line  
8 with the literature, we first hypothesized that PP and MP would similarly enhance arm reaching  
9 movements, with improvements for all parameters but with greater gains for PP. Alternatively,  
10 temporal parameters would similarly improve following PP and MP, as sensory feedback is not  
11 a prerequisite in that case, whereas spatial and smoothness parameters would be less improved  
12 after MP.

13

## 14 **Method**

### 15 *Participants*

16 Forty-five right-handed adults participated in this study after giving their informed  
17 consent. All were healthy and self-reported being free from neurological or physical disorders.  
18 The participants were randomly assigned into three groups: the Physical Practice group (PP, n  
19 = 15, 6 females, mean age:  $25 \pm 2$  years old), the Mental Practice group (MP, n = 15, 9 females,  
20 mean age:  $25 \pm 6$  years old), and the Control group (Ctrl, n = 15, 7 females, mean age:  $28 \pm 4$   
21 years old).

22 Motor imagery vividness of the MP group was assessed by the French version of the  
23 revised Movement Imagery Questionnaire 'MIQr' (Lorant and Nicolas, 2004). The MIQr is an  
24 8-item self-report questionnaire, in which the participants rate the vividness of their mental

1 images using 7-point scales ranging from 1 (really difficult to feel/visualize) to 7 (really easy  
2 to feel/visualize), on two modalities (visual imagery and kinesthetic imagery). The average  
3 score obtained in the current study was  $42.1 \pm 9.5$  (maximum score: 56; minimum score: 8),  
4 revealing good imagery capabilities.

5

## 6 ***Experimental Device***

7 The participants were comfortably seated on a chair in front of a graphic tablet (Intuos4,  
8 XL, Wacom, Krefeld, Germany), on which four square-targets (1x1 cm) were presented (see  
9 Fig.1A). The distance between the participants' sternum and the first target (T1) was 10 cm.  
10 One trial included 10 successive target-to-target movements in the following order: 1 – 2 – 3 –  
11 4 – 1 – 2 – 3 – 4 – 1 – 2 – 3. The participants were instructed to reach each target with a pencil  
12 as accurately and as fast as possible (Fig.1B).

13

## 14 ***Experimental procedure***

15 The experimental protocol included two *test* sessions (PreTest and PostTest) and one  
16 *training* session (Fig. 1C). During the *test* sessions, all the participants performed 3 actual trials  
17 as fast and accurately as possible. During the training session, the participants of the PP were  
18 trained as fast and accurately as possible to the task, while those of the MP group were  
19 instructed to imagine themselves performing the task as fast and accurately as possible,  
20 combining kinesthetic and visual (first-person perspective) imagery modalities. Both training  
21 groups performed 60 trials, divided into 6 blocks with 1-min rest between blocks to avoid  
22 mental fatigue (Rozand et al., 2016). The Ctrl group watched a non-emotional documentary  
23 (“Home”, directed by Y. Arthus-Bertrand, 2009) for 30 min (the approximate time of both  
24 training sessions).

25

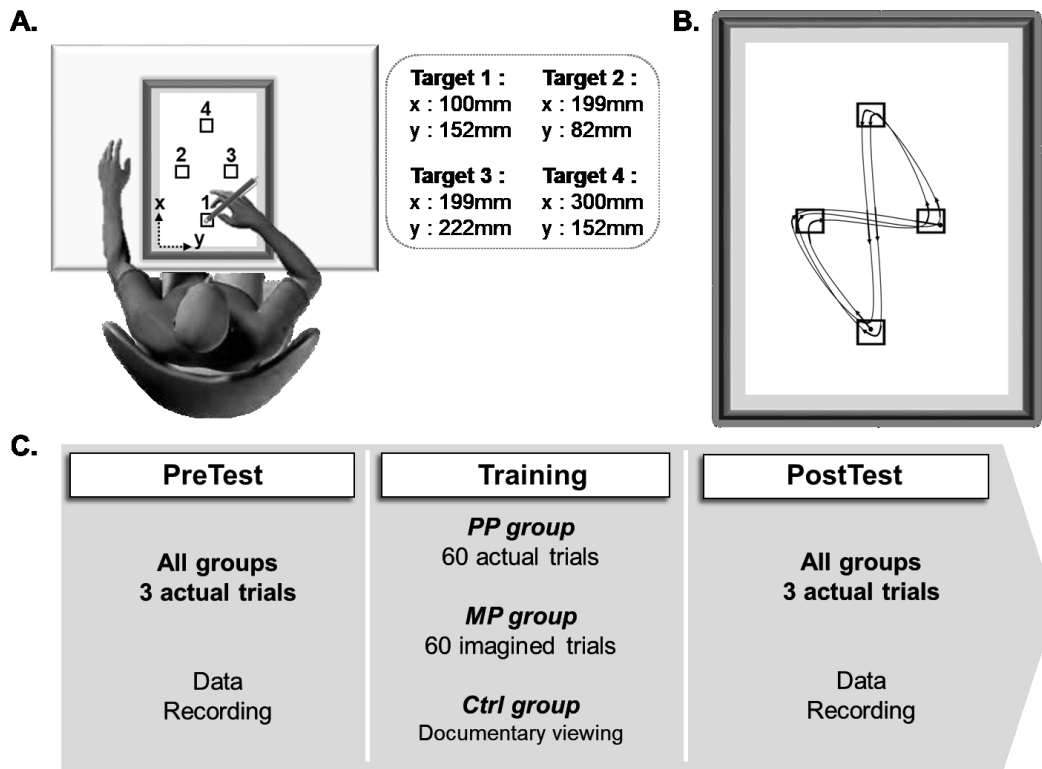

1

2 **Fig. 1.** **A.** Participants' position and targets location on the graphic tablet. **B.** One trial included 10 successive track  
3 movements between the targets, as fast as possible without missing any target (1 – 2 – 3 – 4 – 1 – 2 – 3 – 4 – 1 –  
4 2 – 3). **C.** Experimental procedure. The protocol included 2 test sessions of 3 actual trials (data recording for each  
5 trial) and one training session. During the training session, the Physical Practice (PP) group physically executed  
6 60 repetitions of the 10 movements, and the Mental Practice (MP) group mentally simulated 60 repetitions of the  
7 10 movements. The Control (Ctrl) group watched a non-emotional documentary.

8

### 9 ***Kinematics recording and analysis***

10 We recorded movement kinematics at 100Hz using a graphic tablet (Intuos4 XL,  
11 Wacom, Krefeld, Germany). The spatial resolution in the present experiment was less than 1  
12 mm. Data processing was performed using custom programs written in Matlab (Mathworks,  
13 Natick, MA). Position signals in the horizontal plane (X, Y) were low-pass filtered using a  
14 digital fifth-order Butterworth filter (zero phase distortion, Matlab 'butter' and 'filtfilt'  
15 functions) at a cut-off frequency of 10 Hz.

1 We computed five parameters for each trial: i) movement duration (MD), i.e., the total  
2 time elapsed between the moment when the pencil exited the first target and entered the final  
3 target; ii) distance, i.e., the total two-dimensional displacement; iii) mean velocity ( $V_{\text{mean}}$ ),  
4 i.e., the average inter-target movement speed; iv) maximal velocity ( $V_{\text{max}}$ ), i.e., the average  
5 of maximal inter-target movement speed; and v) number of velocity peaks (NbPeaks), i.e., the  
6 number of local maxima detected on velocity profiles. We used this parameter to quantify  
7 movement smoothness (Brooks et al., 1973; Fethers and Todd, 1987; Balasubramanian et al.,  
8 2015); the smaller the number of peaks, the smoother the movement.

9 For each parameter, we calculated the gain between PreTest and PostTest. To  
10 systematically represent gains with positive values, we calculated gains for MD, NbPeaks, and  
11 distance as follows:

$$12 \quad \text{Gain}(\%) = \left( \frac{\text{PreTest}}{\text{PostTest}} - 1 \right) \times 100$$

13

14 and for  $V_{\text{max}}$  and  $V_{\text{mean}}$  as follows:

$$15 \quad \text{Gain}(\%) = \left( 1 - \frac{\text{PreTest}}{\text{PostTest}} \right) \times 100$$

16

### 17 ***Electromyographic recording and analysis***

18 To verify that muscles were not activated during mental training (MP group),  
19 electromyographic (EMG) activity of the biceps brachii (BB) and the triceps brachii (TB)  
20 muscles of the right arm were recorded during each imagined trial and compared to EMG  
21 activity at rest (10-second recording before training). We used pairs of bipolar silver chloride  
22 circular (10-mm diameter) surface electrodes. We positioned the electrodes parallel to muscle



1 fibers, over the middle of the muscles belly with an inter-electrode (center-to-center) distance  
2 of 20 mm. The reference electrode was positioned on the medial elbow epicondyle. After  
3 shaving and dry-cleaning the skin with alcohol, the impedance was below 5 k $\Omega$ . EMG signals  
4 were amplified (gain 1000), filtered (with a bandwidth frequency ranging from 10 Hz to 1 kHz),  
5 and converted for digital recording and storage with PowerLab 26T and LabChart 7 (AD  
6 Instruments). We analyzed the EMG patterns of the muscles by computing their activation level  
7 (RMS, root mean square) using the following formula:

$$8 \quad RMS = \sqrt{\frac{1}{MD} \int_0^{MD} (EMG)^2 dt}$$

9

## 10 ***Statistical analysis***

11 We performed the analyses on motor gains to reduce variability between participants,  
12 especially at PreTest. We primarily checked the normality of the data (Shapiro-Wilk test), the  
13 equality of variance (Levene's test), and the sphericity (Mauchly's test).

14 First, we used unilateral one-sample t-tests compared to the reference value 100 to check  
15 whether motor performances improved between Pre and PostTest, for each parameter and each  
16 group. Cohen's d was reported for each test and the statistical significance threshold was set at  
17 0.05. P values were adjusted using the Bonferroni method (divided by the number of  
18 comparisons).

19 To compare gains between groups, we then performed one-factor ANOVAs with *Group*  
20 as a between-subject factor and planned comparisons using orthogonal contrasts analysis for  
21 each parameter (Howell, 2012). We constructed a contrast matrix to test the following *a priori*  
22 assumptions: i) MP and PP led to better gain when compared to an absence of practice, i.e., Ctrl  
23 group (contrast C1), and ii) PP led to better gain when compared to MP (contrast C2).

1           To identify the parameters that best discriminated the groups, we finally realized a  
2 stepwise generalized linear discriminant analysis. This exploratory data analysis first consisted  
3 in the identification of discriminant parameters, and then in the creation of functions that  
4 combined these discriminant parameters. The resulting functions were used as a linear classifier  
5 to investigate the data organization according to the categorical predictors (i.e., groups) and the  
6 independent variables (i.e., parameters). To test if the discriminant functions classified the  
7 experimental observations in their respective groups better than chance (i.e., if the combinations  
8 of identified factors were indeed relevant to group discrimination), we used the Press Q statistic  
9 (Hair et al., 1998).

10           Also, to ensure that participants of the MP group did not activate their muscles during  
11 MP, we used Friedman's ANOVAs, comparing the EMG activity of each imagined block with  
12 the rest condition, for each muscle (BB and TB).

13

## 14 **Results**

### 15 *Summary data*

16 Table 1 reports the mean values and the mean gains for the five kinematic parameters.

|             | PreTest              | PostTest      | Gain (%)      |               |
|-------------|----------------------|---------------|---------------|---------------|
|             | Mean (SD)            | Mean (SD)     | Mean (SD)     |               |
| <i>PP</i>   | <i>MD (s)</i>        | 4.87 (0.97)   | 4.17 (0.78)   | 17.31 (15.26) |
|             | <i>Distance (cm)</i> | 162.01 (5.35) | 163.19 (6.61) | -0.61 (4.23)  |
|             | <i>Vmean (cm/s)</i>  | 32.61 (8.07)  | 37.79 (8.42)  | 13.31 (11.81) |
|             | <i>Vmax (cm/s)</i>   | 71.98 (22.12) | 81.37 (26.18) | 10.39 (10.34) |
|             | <i>NbPeaks</i>       | 5.63 (2.14)   | 4.18 (1.47)   | 37.07 (29.37) |
| <i>MP</i>   | <i>MD (s)</i>        | 4.80 (0.92)   | 4.43 (0.82)   | 9.11 (13.16)  |
|             | <i>Distance (cm)</i> | 164.42 (5.24) | 164.23 (3.72) | 0.1 (1.94)    |
|             | <i>Vmean (cm/s)</i>  | 32.43 (5.38)  | 35.25 (5.91)  | 7.38 (11.34)  |
|             | <i>Vmax (cm/s)</i>   | 73.44 (13.25) | 81.25 (12.35) | 9.39 (11.43)  |
|             | <i>NbPeaks</i>       | 4.60 (1.13)   | 3.87 (0.77)   | 18.62 (15.25) |
| <i>Ctrl</i> | <i>MD (s)</i>        | 4.87 (0.84)   | 4.67 (0.87)   | 4.85 (7.89)   |
|             | <i>Distance (cm)</i> | 163.55 (4.34) | 163.54 (4.44) | 0.02 (1.49)   |
|             | <i>Vmean (cm/s)</i>  | 32.31 (5.94)  | 33.76 (6.74)  | 3.82 (6.53)   |
|             | <i>Vmax (cm/s)</i>   | 71.59 (14.27) | 71.18 (15.56) | -1.03 (6.30)  |
|             | <i>NbPeaks</i>       | 6.22 (2.27)   | 5.75 (2.45)   | 11.48 (19.15) |

1

2 **Table 1.** Average values and standard deviation (SD) for the PreTest, PostTest, and gains of the  
3 five parameters and the three experimental groups. MD: Movement duration; Vmean: Mean  
4 velocity; Vmax: Maximal velocity; NbPeaks: Number of peaks, s: second, cm: centimeter.

5

### 6 *One sample t-tests*

7 Firstly, to check whether motor performances improved between PreTest and PostTest  
8 after practices, we used unilateral one-sample t-tests compared to the reference value 100. Table  
9 2 reports the results and effect sizes for one-sample t-tests analysis.

|             |                 | <b>t (14)</b> | <b>p (adjusted)</b> | <b>Cohen's d</b> |
|-------------|-----------------|---------------|---------------------|------------------|
| <b>PP</b>   | <b>MD</b>       | 4.39          | 0.0009              | 1.13             |
|             | <b>Vmean</b>    | 4.36          | 0.001               | 1.12             |
|             | <b>Vmax</b>     | 3.9           | 0.002               | 1                |
|             | <b>NbPeaks</b>  | 4.89          | 0.0003              | 1.26             |
|             | <b>Distance</b> | -0.55         | 1                   | -0.14            |
| <b>MP</b>   | <b>MD</b>       | 2.68          | 0.027               | 0.69             |
|             | <b>Vmean</b>    | 2.52          | 0.037               | 0.65             |
|             | <b>Vmax</b>     | 3.26          | 0.008               | 0.84             |
|             | <b>NbPeaks</b>  | 4.84          | 0.0004              | 1.25             |
|             | <b>Distance</b> | 0.21          | 1                   | 0.05             |
| <b>Ctrl</b> | <b>MD</b>       | 2.38          | 0.048               | 0.61             |
|             | <b>Vmean</b>    | 2.26          | 0.06                | 0.58             |
|             | <b>Vmax</b>     | -0.63         | 0.8                 | -0.16            |
|             | <b>NbPeaks</b>  | 2.32          | 0.053               | 0.6              |
|             | <b>Distance</b> | 0.05          | 1                   | 0.01             |

1

2 **Table 2.** Summarized results and effect sizes for one-sample t-tests analysis. PP: Physical  
3 practice group; MP: Mental practice group; Ctrl; Control group. MD: Movement duration;  
4 Vmean: Mean velocity; Vmax: Maximal velocity; NbPeaks: Number of peaks.

5

6 PP and MP groups significantly improved their performances between PreTest and  
7 PostTest sessions. Precisely, MD and NbPeaks decreased, while Vmax and Vmean increased  
8 after practice. The Ctrl group improved movement duration. No significant effect of Distance  
9 was observed (all  $p$ 's > 0.05).

10

11

1 **One factor ANOVA and contrast analysis**

2 Secondly, we compared gains between groups by means of one-factor ANOVAs and planned  
3 comparisons. The results are depicted in Figure 2.

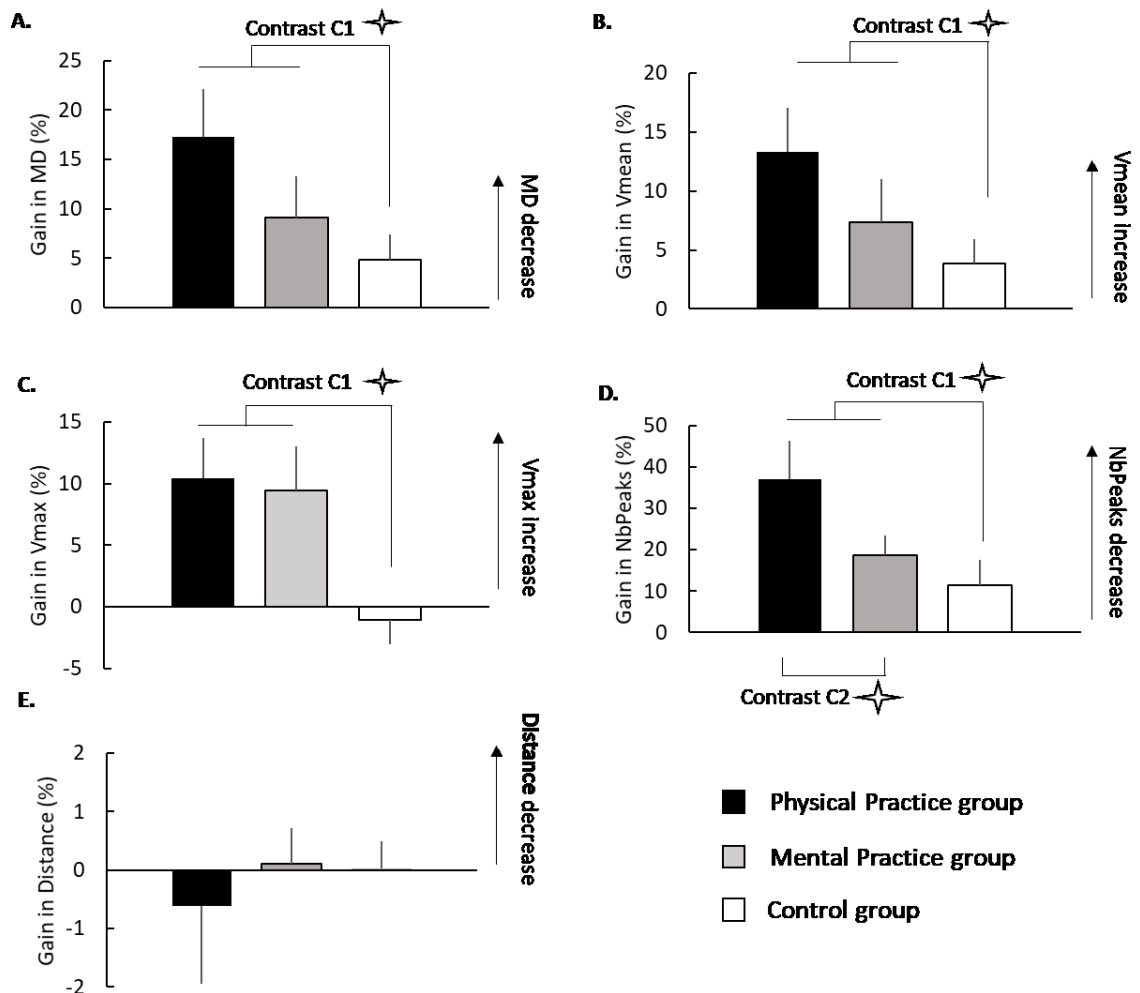

4

5 **Fig. 2.** Mean gains (+SE) for MD (**A.** movement duration), Vmean (**B.** mean velocity), Vmax  
6 (**C.** maximal velocity), NbPeaks (**D.** number of peaks) and in distance (**E.**) for each group. Stars  
7 indicate significant effect of the contrasts (C1: Ctrl vs PP + MP and C2: PP vs MP).

8

9 The ANOVA revealed a main effect of Group for MD ( $F_{2,42} = 3.85, p = 0.03, \eta_p^2 = 0.15$ ),  
10 Vmean ( $F_{2,42} = 3.32, p = 0.045, \eta_p^2 = 0.14$ ), Vmax ( $F_{2,42} = 6.64, p < 0.01, \eta_p^2 = 0.24$ ) and NbPeaks  
11 ( $F_{2,42} = 5.37, p < 0.01, \eta_p^2 = 0.2$ ), but nor for Distance ( $F_{2,42} = 0.29, p = 0.75$ ). The contrast

1 analysis revealed significant effect of the contrast C1 (Ctrl vs MP + PP) for MD ( $t= 2.11, p=$   
2  $0.04, Cohen's d= 0.69$ ), Vmean ( $t= 2.02, p= 0.049, Cohen's d= 0.66$ ), Vmax ( $t= 3.63, p< 0.01,$   
3  $Cohen's d= 1.18$ ) and NbPeaks ( $t= 2.36, p= 0.02, Cohen's d= 0.78$ ), without effect for Distance  
4 ( $t= -0.3, p= 0.76$ ). This confirms that, except for Distance, practice (MP & PP) improved motor  
5 performance when compared to the absence of practice (Ctrl). The contrast C2 (MP vs PP)  
6 revealed no statistically significant difference for MD, Vmean, Vmax or Distance (*all p's >*  
7 *0.12*). However, there was a significant effect for the contrast C2 regarding NbPeaks ( $t= 2.27,$   
8  $p= 0.03, Cohen's d= 0.82$ ), suggesting better performance after PP than MP.

9

#### 10 ***Stepwise generalized linear discriminant analysis***

11 Finally, we performed a stepwise generalized linear discriminant analysis to identify the  
12 parameters that best discriminated the groups. The three groups (PP, MP, and Ctrl) were  
13 considered as the dependent variable and the gains for each parameter as the independent  
14 variable. The discriminant power of each variable was tested using a forward stepwise  
15 approach, revealing that Vmax and NbPeaks significantly contributed to group discrimination  
16 ( $F_2 = 5.19, p< 0.01$  and  $F_2 = 3.99, p= 0.025$ , respectively), whereas MD ( $F_2 = 1.41, p= 0.25$ ),  
17 distance ( $F_2 = 0.04, p= 0.96$ ), and Vmean ( $F_2 = 1.38, p= 0.26$ ) did not.

18

19 The discriminant analysis gave two canonical functions (*Wilks'  $\lambda= 0.64; \chi^2 (4) = 18.62,$*   
20  *$p< .01$  for the first function; *Wilks'  $\lambda = 0.84; \chi^2 (1) = 7.43, p< .01$  for the second one).* The first  
21 discriminant function accounted for 30.94% of total variance, while the second one for 19.61%,  
22 for a total of 50.55%. The classification accuracy of the discriminant functions was 62.2% with  
23 a significant Press Q score ( $\chi^2 (1) = 16.9, p< .01$ ). This result ensures that the discriminant  
24 functions classified experimental observations in their respective groups better than chance (i.e.,*

1 50%). To conclude, the results of discriminant analysis and contrasts analysis suggest that  
2  $V_{max}$  discriminates practice from the absence of practice, whereas  $N_{bpeaks}$  also discriminates  
3 the performance improvement between PP and MP.

4

### 5 *Electromyographic analysis*

6 Participants did not activate their muscles during mental training in comparison to rest.  
7 Statistical comparison (Friedman's Anova) of EMG activity between each block of MP and rest  
8 revealed no significant difference neither for the BB muscle ( $X^2=5.47$ ;  $p=0.48$ ) nor for the TB  
9 muscle ( $X^2=10.39$ ;  $p=0.11$ ).

10

## 11 **Discussion**

12 In the current study, we identified the number of velocity peaks, an indicator of  
13 movement smoothness, as the most relevant parameter that differentiated PP from MP for an  
14 arm pointing task. While classical parameters as movement duration or maximal and mean  
15 velocity improved in a comparable extent following both practices, movement smoothness  
16 improved following MP but to a lower extent than that after PP. These findings provide relevant  
17 information about the specific influence of practice types on motor performance parameters.

18

### 19 *General motor performance improvement*

20 Motor performance improvement of arm reaching movement have been widely  
21 investigated, considering both PP and MP (Gentili et al. 2006; Gentili et al. 2010; Yàgüez et al.  
22 1998; Ingram et al. 2019). Our findings corroborate previous results, showing an improvement  
23 of temporal parameters, such as movement duration, mean and maximal velocity after both  
24 practices, compared to the Control group.

1           The improvement of motor performance following MP could be explained by the  
2 concept of forward internal model (Gentili et al. 2006; Gentili et al. 2010; Dahm et Rieger 2019;  
3 Kilteni et al. 2018). The internal model theory postulates the existence of predictive processes  
4 that simulate sensory prediction and the dynamic consequences of action (Wolpert and  
5 Flanagan, 2001; Friston, 2011; Kilteni et al., 2018). During the mental simulation of a  
6 movement, an efferent copy generated by the controller would be transmitted to predictive  
7 models, allowing to generate two predictions: a prediction of the consequences of action  
8 (Ruffino et al. 2021) and a prediction of the related-movement sensory afferents (Grush, 2004).  
9 The comparison between these predictions and the stored movement representation would be  
10 fed back as input to the controller, leading to an improvement of motor command despite the  
11 absence of feedbacks. Interestingly, PP and MP increased mean and maximal velocity to the  
12 same extent, but PP greater decreased the number of velocity peaks. These findings provide  
13 evidence that PP and MP may improve specifically the parameters of performance for arm  
14 reaching tasks.

15

### 16 ***Movement smoothness discriminates physical and mental practices***

17           The arm reaching movements can be decomposed in two distinct phases: i) an initial  
18 impulse phase, involving predictive loops and ii) a final phase, known as the corrective phase,  
19 implying online movement corrections (Elliott et al., 2001; Thompson et al., 2007). Kinematic  
20 analyses revealed that the first phase can be characterized by one or two high velocity peaks,  
21 permitting to quickly get closer to the target, while the second contains low secondary velocity  
22 peaks, which are likely to represent corrective sub-movements when approaching the target  
23 (Novak et al., 2002). The authors also suggested that PP leads to faster and precise initial  
24 movements in order to quickly approach the target and to reduce the number of corrective sub-  
25 movements, respectively. Here, we discuss the difference in number of velocity peaks between



1 PP and MP groups, considering the insights of studies that investigated the absence of feedbacks  
2 during actual reaching movements (Khan et al., 2003; Franklin et al., 2017). These studies  
3 showed that the actual execution of fast and smooth movements during the initial phase is  
4 possible with or without feedbacks, whereas the reduction of the endpoint variability during the  
5 final phase is feedback-dependent. Because of the similar increase of  $V_{max}$  for both groups  
6 and the decrease of NbPeaks, even for MP, we suggest that both PP and MP may lead to the  
7 execution of faster and precise initial movements that minimize the corrective phase and thus  
8 reduce the number of sub-movements. The distinction between PP and MP could thus stand in  
9 the corrective phase, where sensory feedbacks are necessary. Indeed, the feedbacks of actual  
10 movements during PP may help to optimize the corrective phase when approaching the target,  
11 and therefore to greater reduce NbPeaks in comparison to MP. The absence of sensory  
12 feedbacks during imagined movements would be an obstacle to reduce the number of sub-  
13 movements when actually approaching the target.

14

## 15 ***Conclusion***

16 In conclusion, the present study provided the first evidence that MP increased  
17 smoothness of arm-reaching movement, and that this performance parameter discriminated  
18 between PP from MP. Although, no sensory feedbacks are present during imagined movements,  
19 the increase of movement velocity would lead to greater smoothness after MP. Further studies  
20 could analyse a broader range of movements and tasks (e.g., to perform and/or imagine the  
21 movement at different velocities) to better understand the influence of MP on movements  
22 parameters.

23

1 **Authors contributions**

2 CR, CP, and FL designed the experiment; CR and DRM recorded the data; DRM and JG  
3 analysed the data; CR and DRM developed figures; CR, DRM, CP and FL wrote the  
4 manuscript; CP, JG, PMH and FL provided feedback on the manuscript; all co-authors read  
5 and approved the submitted version.

6

7 **Funding**

8 This work was supported by the French-German ANR program in human and social sciences  
9 (contract ANR-17-FRAL-0012-01).

10

11 **Conflict of Interest Statement**

12 The authors declare that the research was conducted in the absence of any commercial or  
13 financial relationship that could be construed as a potential conflict of interest.

14

15

## 1 **References**

- 2 Allami N, Paulignan Y, Brovelli A, Boussaoud D (2008) Visuo-motor learning with  
3 combination of different rates of motor imagery and physical practice. *Exp Brain Res*  
4 184:105–113.
- 5 Avanzino L, Gueugneau N, Bisio A, Ruggeri P, Papaxanthis C, Bove M (2015) Motor cortical  
6 plasticity induced by motor learning through mental practice. *Front Behav Neurosci* 9.
- 7 Balasubramanian S, Melendez-Calderon A, Roby-Brami A, Burdet E (2015) On the analysis  
8 of movement smoothness. *J Neuroeng Rehabil* 12:1–11.
- 9 Brooks VB, Cooke JD, Thomas JS (1973) The Continuity of Movements. *Control of Posture*  
10 *and Locomotion* 257–272.
- 11 Criscimagna-Hemminger SE, Bastian AJ, Shadmehr R (2010) Size of error affects cerebellar  
12 contributions to motor learning. *J Neurophysiol* 103:2275–2284.
- 13 Dahm SF, Rieger M (2019) Is imagery better than reality? Performance in imagined dart  
14 throwing. *Hum Mov Sci* 66:38–52.
- 15 Elliott D, Chua R, Helsen WF (2001) A century later: Woodworth's (1899) two-component  
16 model of goal-directed aiming. *Psychol Bull* 127:342–357.
- 17 Fethers L, Todd J (1987) Quantitative assessment of infant reaching movements. *J Mot Behav*  
18 19:147–166.
- 19 Franklin S, Wolpert DM, Franklin DW (2017) Rapid visuomotor feedback gains are tuned to  
20 the task dynamics. *J Neurophysiol* 118:2711–2726.
- 21 Friston K (2011) What is optimal about motor control? *Neuron* 72:488–498.
- 22 Gentili R, Han CE, Schweighofer N, Papaxanthis C (2010) Motor learning without doing:

- 1 trial-by-trial improvement in motor performance during mental training. *J Neurophysiol*  
2 104:774–7830
- 3 Gentili R, Papaxanthis C, Pozzo T (2006) Improvement and generalization of arm motor  
4 performance through motor imagery practice. *Neuroscience* 137:761–772.
- 5 Grosprêtre S, Jacquet T, Lebon F, Papaxanthis C, Martin A (2018) Neural mechanisms of  
6 strength increase after one-week motor imagery training. *Eur J Sport Sci* 18:209–218.
- 7 Grosprêtre S, Lebon F, Papaxanthis C, Martin A (2019) Spinal plasticity with motor imagery  
8 practice. *J Physiol* 597:921–934.
- 9 Grush R (2004) The emulation theory of representation: Motor control, imagery, and  
10 perception. *Behav Brain Sci* 27:377–396.
- 11 Hair JF, Anderson RE, Tatham RL, West JB (1998) *Multivariate data analysis*. In: 5th ed. Upper  
12 Saddle River, New Jersey: Prentice-Hall, Inc.
- 13 Howell DC (2012) *Statistical Methods for Psychology* (8th edition). Belmont, CA :  
14 Wadsworth Publishing.
- 15 Ingram TGJ, Solomon JP, Westwood DA, Boe SG (2019) Movement related sensory  
16 feedback is not necessary for learning to execute a motor skill. *Behav Brain Res*  
17 359:135–142.
- 18 Izawa J, Shadmehr R (2011) Learning from sensory and reward prediction errors during  
19 motor adaptation. *PLoS Comput Biol* 7:1002012.
- 20 Karni A, Meyer G, Rey-Hipolito C, Jezard P, Adams MM, Turner R, Ungerleider LG (1998)  
21 The acquisition of skilled motor performance: Fast and slow experience-driven changes  
22 in primary motor cortex. *Proc Natl Acad Sci U S A* 95:861–868.

- 1 Kawato M, Kuroda T, Imamizu H, Nakano E, Miyauchi S, Yoshioka T (2003) Internal  
2 forward models in the cerebellum: fMRI study on grip force and load force coupling.  
3 Prog Brain Res 142.
- 4 Kelso JAS, Southard DL, Goodman D (1979) On the nature of human interlimb coordination.  
5 Science (80- ) 203:1029–1031.
- 6 Ketcham CJ, Seidler RD, Van Gemmert AWA, Stelmach GE (2002) Age-Related Kinematic  
7 Differences as Influenced by Task Difficulty, Target Size, and Movement Amplitude.  
8 Journals Gerontol Ser B Psychol Sci Soc Sci 57:P54–P64.
- 9 Ketcham CJ, Stelmach GE (2004) Movement Control in the Older Adult. Technology for  
10 adaptive aging.
- 11 Khan MA, Lawrence G, Fourkas A, Franks IM, Elliott D, Pembroke S (2003) Online versus  
12 offline processing of visual feedback in the control of movement amplitude. Acta  
13 Psychol (Amst) 113:83–97.
- 14 Kilteni K, Andersson BJ, Houborg C, Ehrsson HH (2018) Motor imagery involves predicting  
15 the sensory consequences of the imagined movement. Nat Commun 9:1617.
- 16 Kitago T, Krakauer JW (2013) Motor learning principles for neurorehabilitation. Handb Clin  
17 Neurol 110:93–103.
- 18 Lebon F, Collet C, Guillot A (2010) Benefits of motor imagery training on muscle strength. J  
19 Strength Cond Res 24:1680–1687.
- 20 Lorant J, Nicolas A (2004) Validation de la traduction française du Movement Imagery  
21 Questionnaire-Revised (MIQ-R). Sci Mot:57–68.
- 22 Novak K, Miller L, Houk J (2002) The use of overlapping submovements in the control of  
23 rapid hand movements. Exp Brain Res 144:351–364.

- 1 Ranganathan VK, Siemionow V, Liu JZ, Sahgal V, Yue GH (2004) From mental power to  
2 muscle power - Gaining strength by using the mind. *Neuropsychologia* 42:944–956.
- 3 Robertson EM, Pascual-Leone A, Miall RC (2004) Current concepts in procedural  
4 consolidation. *Nat Rev Neurosci* 5:576–582.
- 5 Rozand V, Lebon F, Stapley PJ, Papaxanthis C, Lepers R (2016) A prolonged motor imagery  
6 session alter imagined and actual movement durations: Potential implications for  
7 neurorehabilitation. *Behav Brain Res* 297:67–75.
- 8 Ruffino C, Gaveau J, Papaxanthis C, Lebon F (2019) An acute session of motor imagery  
9 training induces use-dependent plasticity. *Sci Rep* 9:20002.
- 10 Ruffino C, Truong C, Dupont W, Bouguila F, Michel C, Lebon F, Papaxanthis C (2021)  
11 Acquisition and consolidation processes following motor imagery practice. *Sci Rep*  
12 11:2295.
- 13 Shadmehr R, Krakauer JW (2008) A computational neuroanatomy for motor control. *Exp*  
14 *Brain Res* 185:359–381.
- 15 Shadmehr R, Smith M a, Krakauer JW (2010) Error correction, sensory prediction, and  
16 adaptation in motor control. *Annu Rev Neurosci* 33:89–108.
- 17 Spampinato D, Celnik P (2017) Temporal dynamics of cerebellar and motor cortex  
18 physiological processes during motor skill learning. *Sci Rep* 7:40715.
- 19 Thompson SG, McConnell DS, Slocum JS, Bohan M (2007) Kinematic analysis of multiple  
20 constraints on a pointing task. *Hum Mov Sci* 26:11–26.].
- 21 Walker MP, Brakefield T, Seidman J, Morgan A, Hobson JA, Stickgold R (2003) Sleep and  
22 the time course of motor skill learning. *Learn Mem* 10:275–284.

- 1 Willingham DB (1998) A neuropsychological theory of motor skill learning. *Psychol Rev*
- 2 105:558–584.
- 3 Wolpert D, Diedrichsen J, Flanagan (2011) Principles of sensorimotor learning. *Nat Rev*
- 4 *Neurosci* 12:739-751.
- 5 Wolpert D, Flanagan J (2001) Motor prediction. *Curr Biol* R729-732.
- 6 Yáguez L, Nagel D, Hoffman H, Canavan A (1998) A mental route to motor learning:
- 7 improving trajectorial kinematics through imagery training. *Behav brain* 90:95–106.
- 8 Yue G, Cole KJ (1992) Strength increases from the motor program: comparison of training
- 9 with maximal voluntary and imagined muscle contractions. *J Neurophysiol* 67:1114–
- 10 1123.
- 11
